# Supplementary material
Source: publisher figshare collection journal article supplement (https://frontiersin.figshare.com/ndownloader/files/17000474)
Supplement: Supplementary file [file 17000474]

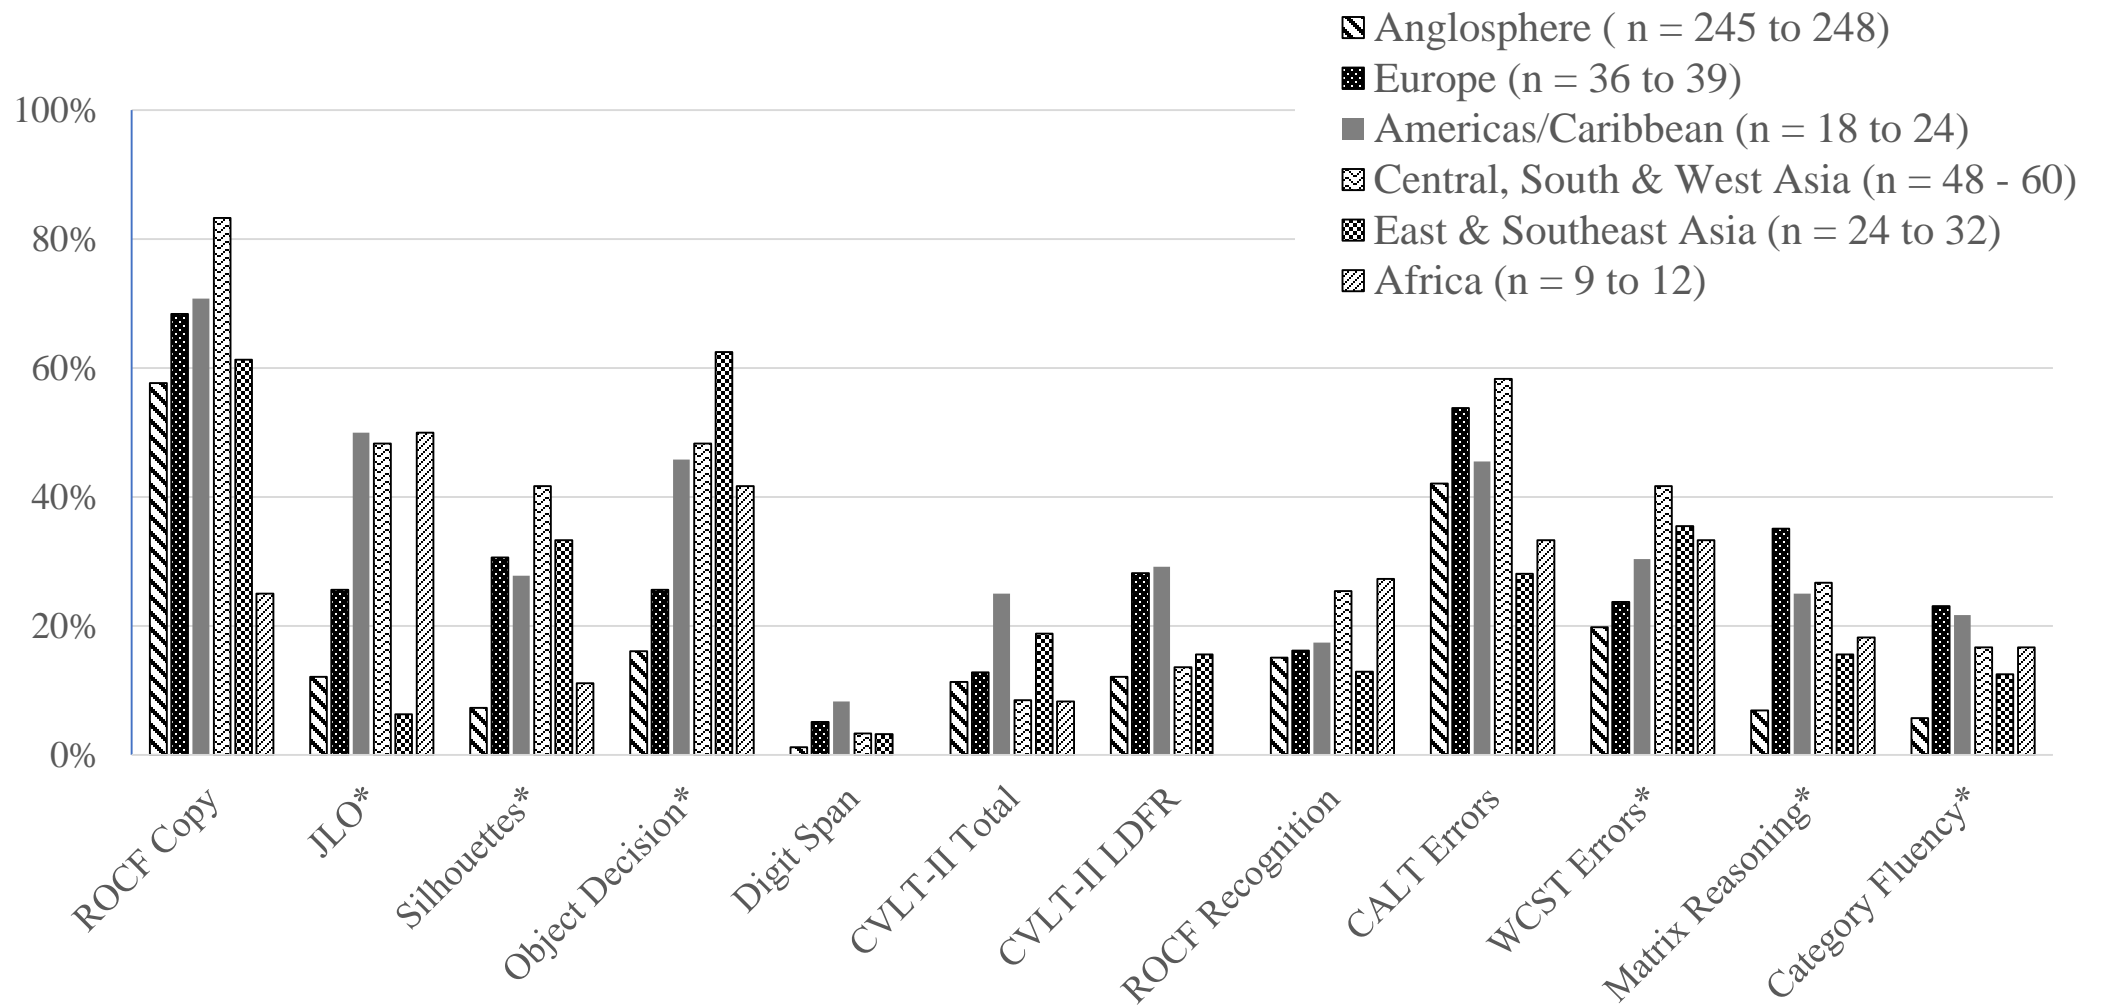

Fig. S1. Frequency of impairment in PD per cognitive tests and world region
